# Supplementary material for: Heterogeneous network propagation with forward similarity integration to enhance drug–target association prediction
Source: PeerJ journal article supplement (doi:10.7717/peerj-cs.1124), 2022-10-11
Supplement: Supplemental_Figure_S1.pdf [file Supplemental_Figure_S1.pdf]

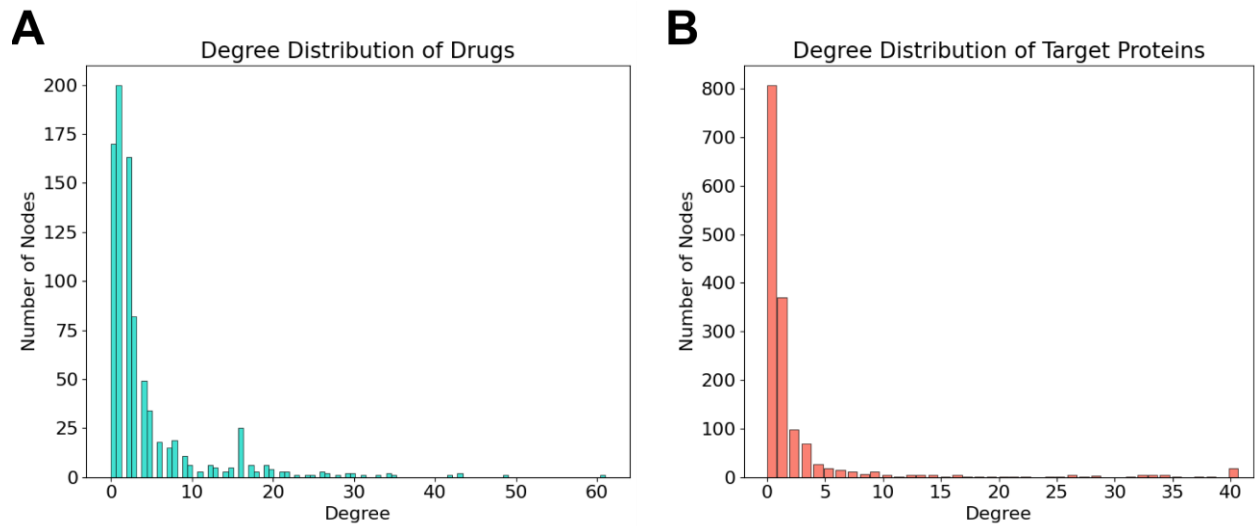

**Supplemental Figure S1: Degree distributions in the drug–target bipartite network.** (A) degree distribution of drugs. (B) degree distribution of targets.
